# Supplementary material for: Classification of high-throughput phenotyping data for differentiation among nutrient deficiency in common bean
Source: Front Plant Sci. 2022 Jul 22;13:931877. doi: 10.3389/fpls.2022.931877 (PMC9353735; doi:10.3389/fpls.2022.931877)
Supplement: Supplementary file 1 [file Data_Sheet_1.xlsx]

## Sheet: ST1
Supplement table 1. Mineral nutrient content in dry weight (DW) of common bean shoots (n=3, mean values ± standard deviation) grown for 12 days (½ modified Hoagland's solution (Control), and solutions without nitrogen (N), phosphorus (P), potassium (K), magnesium (Mg) and iron (Fe)).
	N		P		K		Mg		Fe
Treatment solution	(g 100 g-1 DW)								(mg kg-1 DW)
Control	4.54	±0.52	1.04	±0.10	3.77	±0.05	0.23	±0.02	214.2	±16.45
N	2.04	±0.11	1.68	±0.16	5.33	±0.20	0.22	±0.01	141.7	±9.58
P	4.6	±0.34	0.08	±0.02	2.18	±0.26	0.2	±0.02	141.1	±9.79
K	5.01	±0.21	1.55	±0.11	0.61	±0.06	0.42	±0.02	158.4	±22.2
Mg	4.28	±0.17	0.86	±0.12	3.4	±0.40	0.04	±0.01	204.5	±16.9
Fe	5.05	±0.28	0.95	±0.02	4.37	±0.27	0.29	±0.02	41.3	±1.30

## Sheet: ST2
Supplement table 2. Reclassification of data into categories based on the discriminant functions inferred from Chlorophyll fluorescence traits (CFT) at four measurement times (MT1-MT4). Accuracy is estimated as (Number of correctly classified data/Total number of data)
Chlorophyll fluorescence traits (CFT)
			MT1						MT2
	Fe	K	Control	Mg	N	P	Fe	K	Control	Mg	N	P
Fe	0.8	0	0.1	0	0.1	0	1	0	0	0	0	0
K	0	0.7	0	0.1	0	0	0	1	0	0	0	0
Control	0.1	0	0.9	0.1	0	0	0	0	1	0	0	0
Mg	0	0.2	0	0.8	0.1	0.2	0	0	0	1	0.1	0
N	0.1	0.1	0	0	0.8	0	0	0	0	0	0.9	0
P	0	0	0	0	0	0.8	0	0	0	0	0	1
Accuracy	0.8						0.98
			MT3						MT4
	Fe	K	Control	Mg	N	P	Fe	K	Control	Mg	N	P
Fe	1	0	0.1	0	0	0	1	0	0	0	0	0
K	0	1	0	0	0	0	0	0.9	0	0	0	0
Control	0	0	0.9	0	0	0	0	0	1	0	0	0
Mg	0	0	0	1	0	0	0	0.1	0	1	0	0
N	0	0	0	0	1	0	0	0	0	0	1	0
P	0	0	0	0	0	1	0	0	0	0	0	1
Accuracy	0.98						0.98

## Sheet: ST3
Supplement table 3. Reclassification of data into categories based on the discriminant functions inferred from Multispectral traits (MST) at four measurement times (MT1-MT4). Accuracy is estimated as (Number of correctly classified data/Total number of data)
Multispectral traits (MST)
			MT1						MT2
	Fe	K	Control	Mg	N	P	Fe	K	Control	Mg	N	P
Fe	1	0	0	0	0	0	0.8	0	0.1	0	0	0
K	0	0.7	0	0	0	0	0	1	0	0	0	0
Control	0	0	1	0	0	0	0.2	0	0.9	0	0	0
Mg	0	0.1	0	1	0	0	0	0	0	0.9	0	0
N	0	0.1	0	0	1	0.2	0	0	0	0.1	1	0
P	0	0.1	0	0	0	0.8	0	0	0	0	0	1
Accuracy	0.92						0.93
			MT3						MT4
	Fe	K	Control	Mg	N	P	Fe	K	Control	Mg	N	P
Fe	0.8	0	0	0.1	0	0	1	0	0	0	0	0
K	0	1	0	0	0	0	0	1	0	0	0	0
Control	0	0	1	0	0	0	0	0	1	0	0	0
Mg	0.2	0	0	0.9	0	0	0	0	0	1	0	0
N	0	0	0	0	1	0	0	0	0	0	1	0
P	0	0	0	0	0	1	0	0	0	0	0	1
Accuracy	0.95						1

## Sheet: ST4
Supplement table 4. Reclassification of data into categories based on the discriminant functions inferred from Morphological traits (MORPH) at four measurement times (MT1-MT4). Accuracy is estimated as (Number of correctly classified data/Total number of data)
Morphological traits (MORPH)
			MT1						MT2
	Fe	K	Control	Mg	N	P	Fe	K	Control	Mg	N	P
Fe	0.7	0	0.1	0	0	0	0.9	0	0.3	0.1	0	0.1
K	0	0.3	0.1	0.3	0.1	0.1	0	0.9	0	0	0.2	0
Control	0.2	0	0.7	0.2	0.1	0.1	0	0	0.7	0	0	0
Mg	0.1	0.3	0.1	0.4	0	0	0.1	0	0	0.6	0.3	0.1
N	0	0.3	0	0	0.8	0.2	0	0.1	0	0.2	0.5	0
P	0	0.1	0	0.1	0	0.6	0	0	0	0.1	0	0.8
Accuracy	0.58						0.73
			MT3						MT4
	Fe	K	Control	Mg	N	P	Fe	K	Control	Mg	N	P
Fe	0.9	0	0.1	0	0	0	0.9	0	0.2	0	0	0
K	0	0.7	0	0	0	0	0	0.9	0	0	0.2	0.2
Control	0	0	0.9	0	0	0	0.1	0	0.8	0	0	0
Mg	0.1	0	0	1	0	0	0	0	0	0.8	0	0.1
N	0	0.3	0	0	0.8	0.1	0	0.1	0	0	0.7	0
P	0	0	0	0	0.2	0.9	0	0	0	0.2	0.1	0.7
Accuracy	0.97						0.8
